# Supplementary material for: Green extract rosemary acid as a viscosity-sensitive molecular sensor in liquid systems
Source: Royal Society of Chemistry journal article supplement (doi:10.1039/d3ay00112a), 2023-01-01
Supplement: d3ay00112a1.pdf [file d3ay00112a1.pdf]

# Analytical Methods

## Supplementary Information

### **Green extract rosemary acid as a viscosity-sensitive molecular sensor in the liquid system**

Lingfeng Xu,<sup>1,2,\*</sup> Hui Peng,<sup>1</sup> Yanrong Huang,<sup>3</sup> Chunfang Huang,<sup>1</sup> Chengning Xie,<sup>4</sup> and Genhe He<sup>1,\*</sup>

*1 Key Laboratory of Biodiversity and Ecological Engineering of Jiangxi Province, Jingtangshan University, Ji'an,*

*Jiangxi 343009, China*

*2 State Key Laboratory of Luminescent Materials & Devices, College of Materials Science & Engineering, South*

*China University of Technology, Guangzhou 510640, China*

*3 School of Modern Agriculture and Forestry Engineering, Ji'an Vocational and Technical College, Ji'an, Jiangxi*

*343009, China*

*4 College of Mechanical and Electrical Engineering, Jingtangshan University, Ji'an, Jiangxi 343009, China*

\* Corresponding author. E-mail: [rs7lfxu@outlook.com](mailto:rs7lfxu@outlook.com).

## Table of contents

|                            |    |
|----------------------------|----|
| Experimental Section ..... | 1  |
| Figure S1 .....            | 2  |
| Figure S2 .....            | 3  |
| Figure S3 .....            | 4  |
| Figure S4 .....            | 5  |
| Figure S5 .....            | 6  |
| Figure S6 .....            | 7  |
| Figure S7 .....            | 8  |
| Figure S8 .....            | 9  |
| Table S1 .....             | 10 |
| Table S2 .....             | 12 |
| Table S3 .....             | 12 |
| Table S4 .....             | 12 |
| References .....           | 13 |

## Experimental Section

### Materials and methods

Potassium carbonate, tetrahydrofuran (THF), toluene, dimethylsulfoxide (DMSO), tetrahydrofuran (THF), N,N-dimethylformamide (DMF), ethanol, ethyl acetate (EA), glycerol and various metal salts such as the sodium chloride, sodium nitrate, and so on, were purchased from Shanghai Aladdin Bio-Chem Technology Co., Ltd. Common food additives including the glucose, D-mannitol, acesulfame, sorbitol, sodium carboxymethyl cellulose (SCC), pectin (Pec), xanthan gum (XG), trisodium citrate dehydrate (TCD), vitamin C (VC), sodium benzoate (SB) and beet molasses (BM) were obtained from Energy-chemical technology (Anhui) Co., Ltd. All the chemical reagents used in this work were of analytical grade and used as received. Triple distilled water was used in the experiments.

Fluorescence spectra were measured by a Hitachi F-7000 fluorescence spectrophotometer. Absorption spectra were recorded on a Hitachi U-3010 UV-vis spectrophotometer. The viscosity determination test was performed on a rotating viscometer (DV2T, Brookfield, AMETEK Corp., USA).

### The Förster–Hoffmann equation

Förster–Hoffmann equation:

$$\log I = C + x \log \eta \quad (1)$$

where  $\eta$  represents the viscosity,  $I$  represents the fluorescence intensity of the natural molecular sensor **RA** at 421 nm,  $C$  is a constant, and  $x$  represents the sensitivity of the natural molecular sensor **RA** toward viscosity.

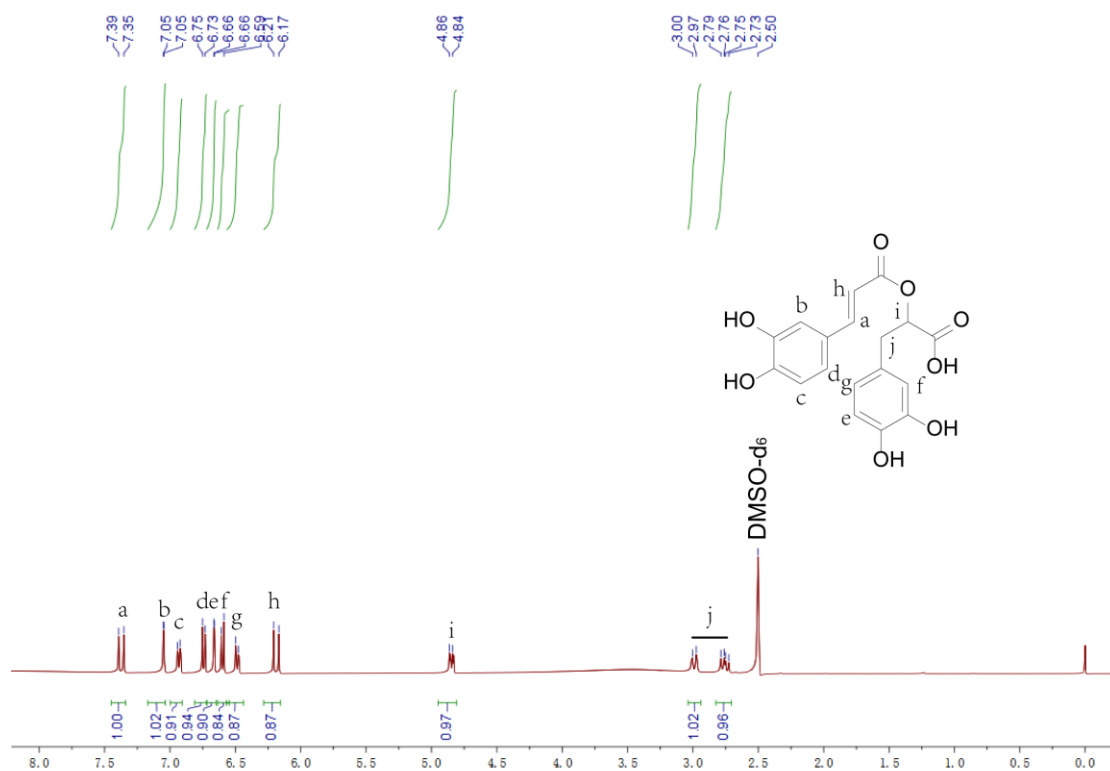

**Figure S1**  $^1\text{H-NMR}$  spectrum of the extracted molecular sensor rosmarinic acid.

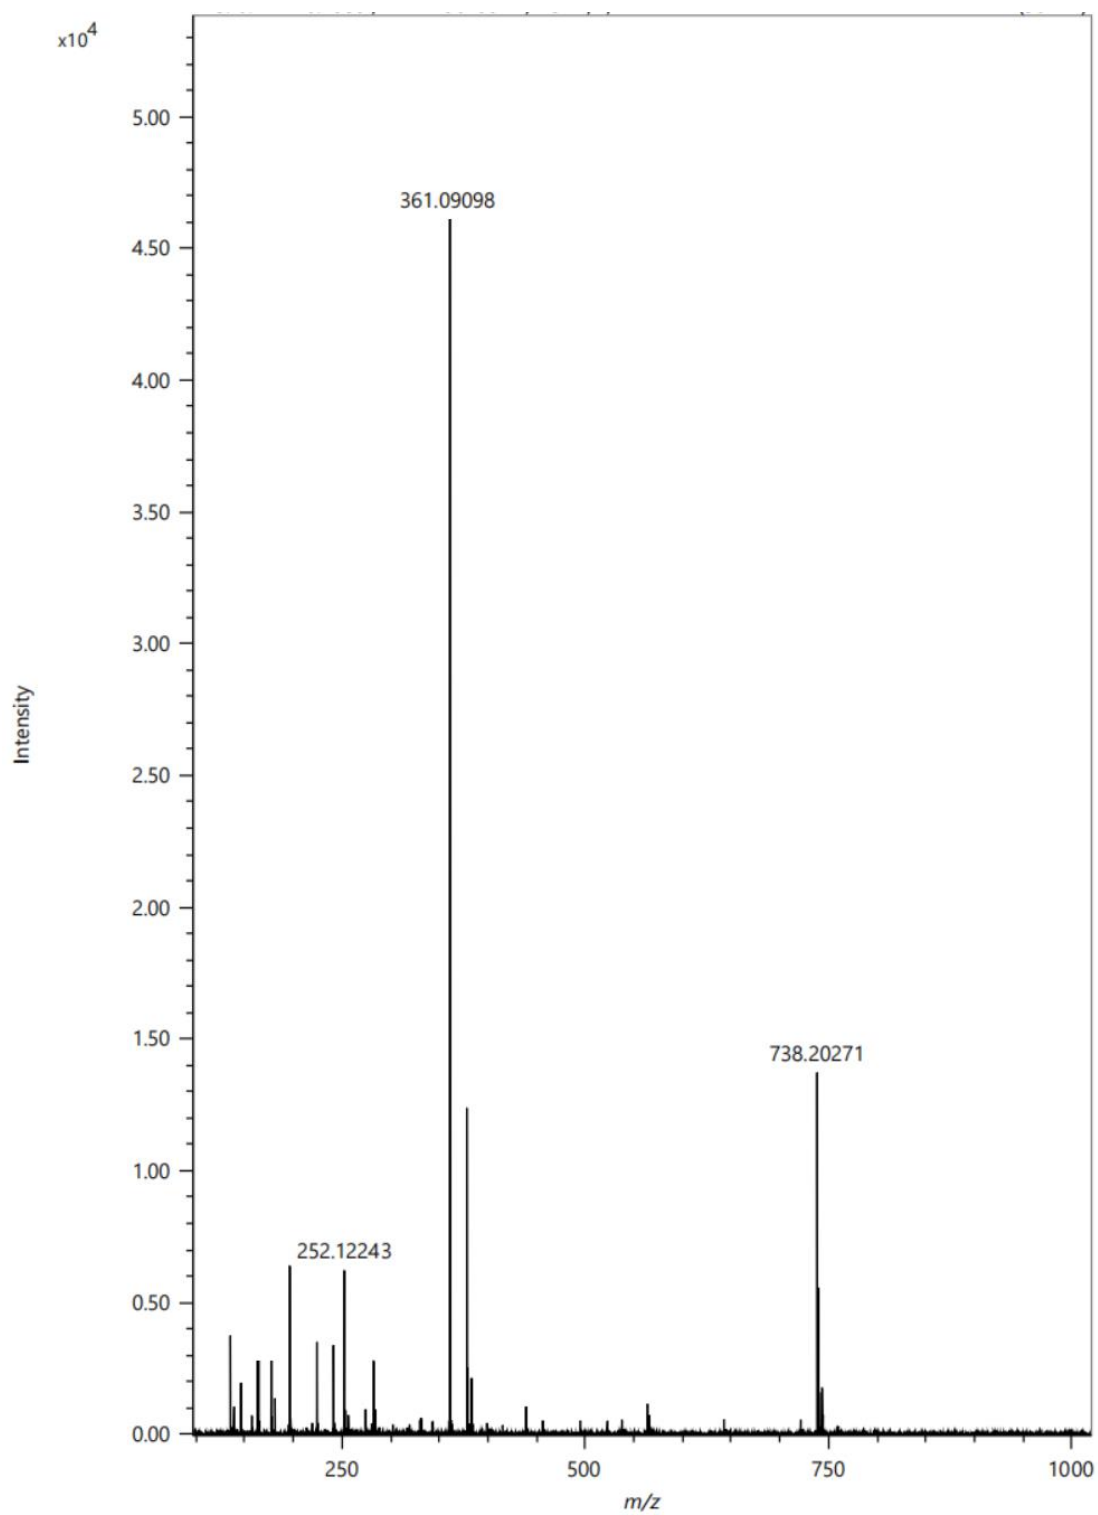

**Figure S2** HR mass spectrum of the extracted molecular sensor rosmarinic acid. MS (ESI):  $m/z$  361.09098  $[M+H]^+$ .

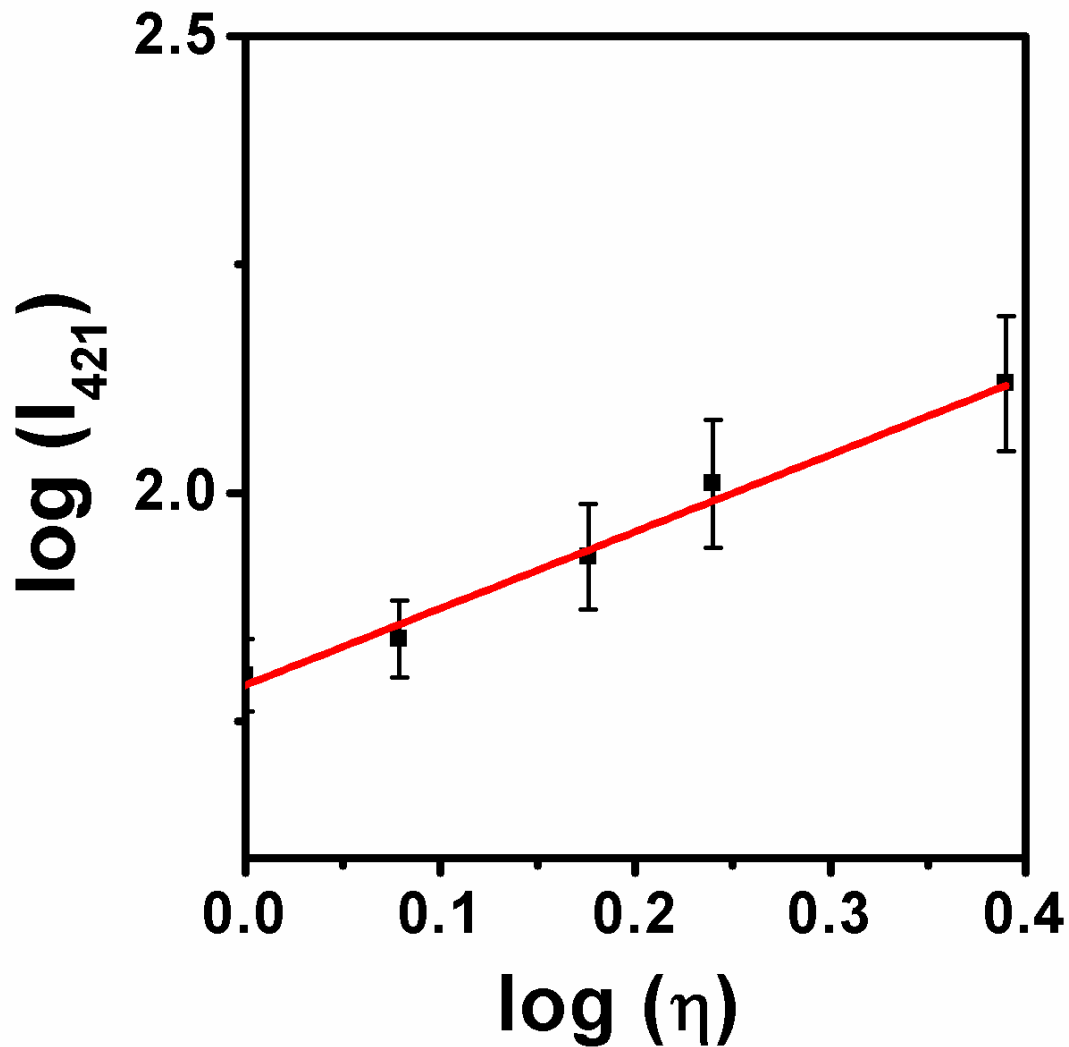

**Figure S3** Detection limit of the natural molecular sensor rosmarinic acid (RA).

The calibration curve was first obtained from the plot of  $\log (I_{421})$  as a function of  $\log (\eta)$ . Then the regression curve equation was obtained for the lower viscosity part.

The detection limit =  $3 \times S.D./k$

Where  $k$  is the slope of the curve equation, and  $S.D.$  represents the standard deviation for the  $\log (I_{421})$  of natural molecular sensor RA.

$$\log (I_{421}) = 1.789 + 0.842 \times \log (\eta) \quad (R^2 = 0.990)$$

$$\log (\text{LOD}) = 3 \times 0.032 / 0.842 = 0.114$$

$$\text{LOD} = 10^{0.114} = 1.301 \text{ cP}$$

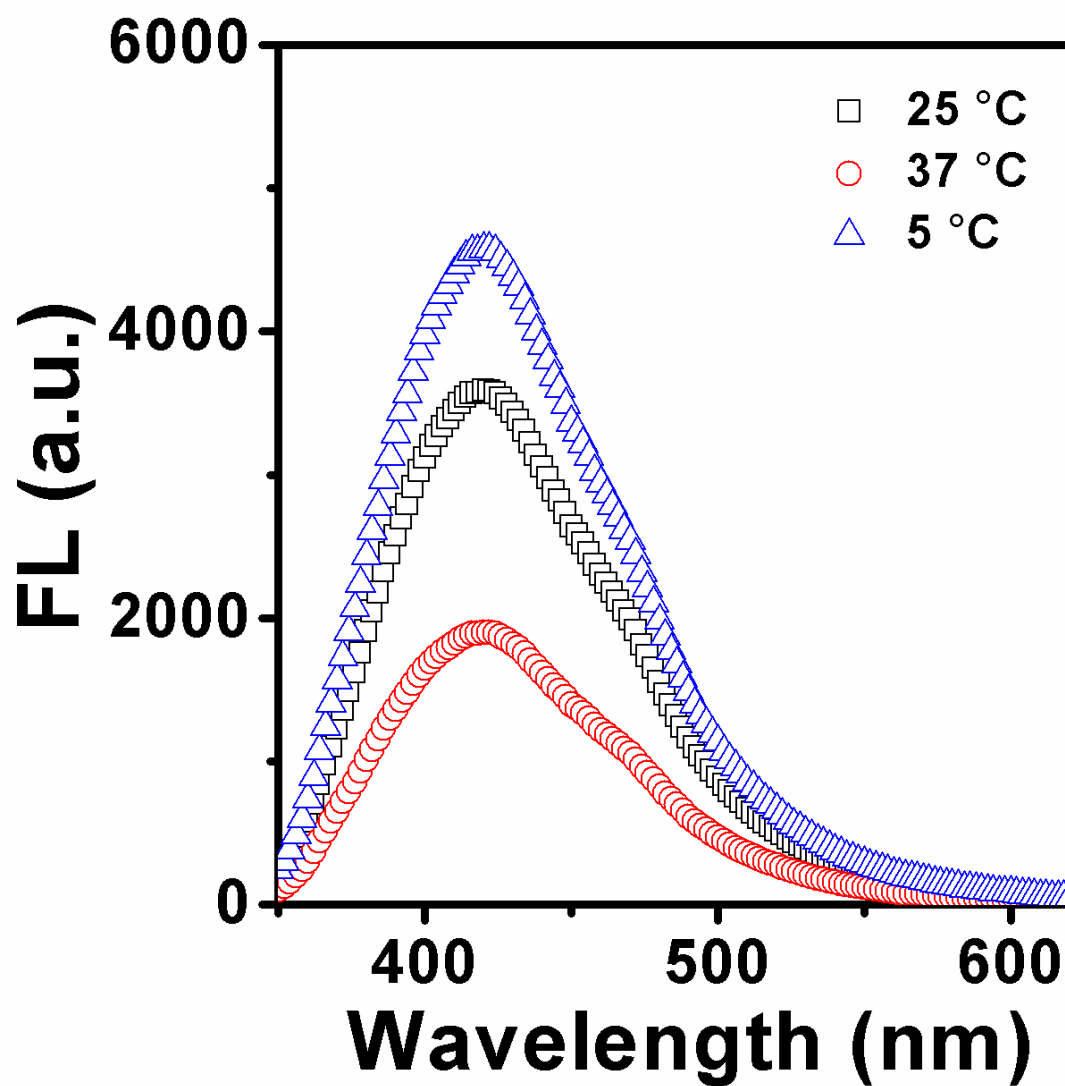

**Figure S4** Fluorescence spectra of the natural molecular sensor RA (10 μM) in glycerol under different temperature, including the ambient temperature (25 °C), higher storage temperature (37 °C), and lower storage temperature (5 °C).

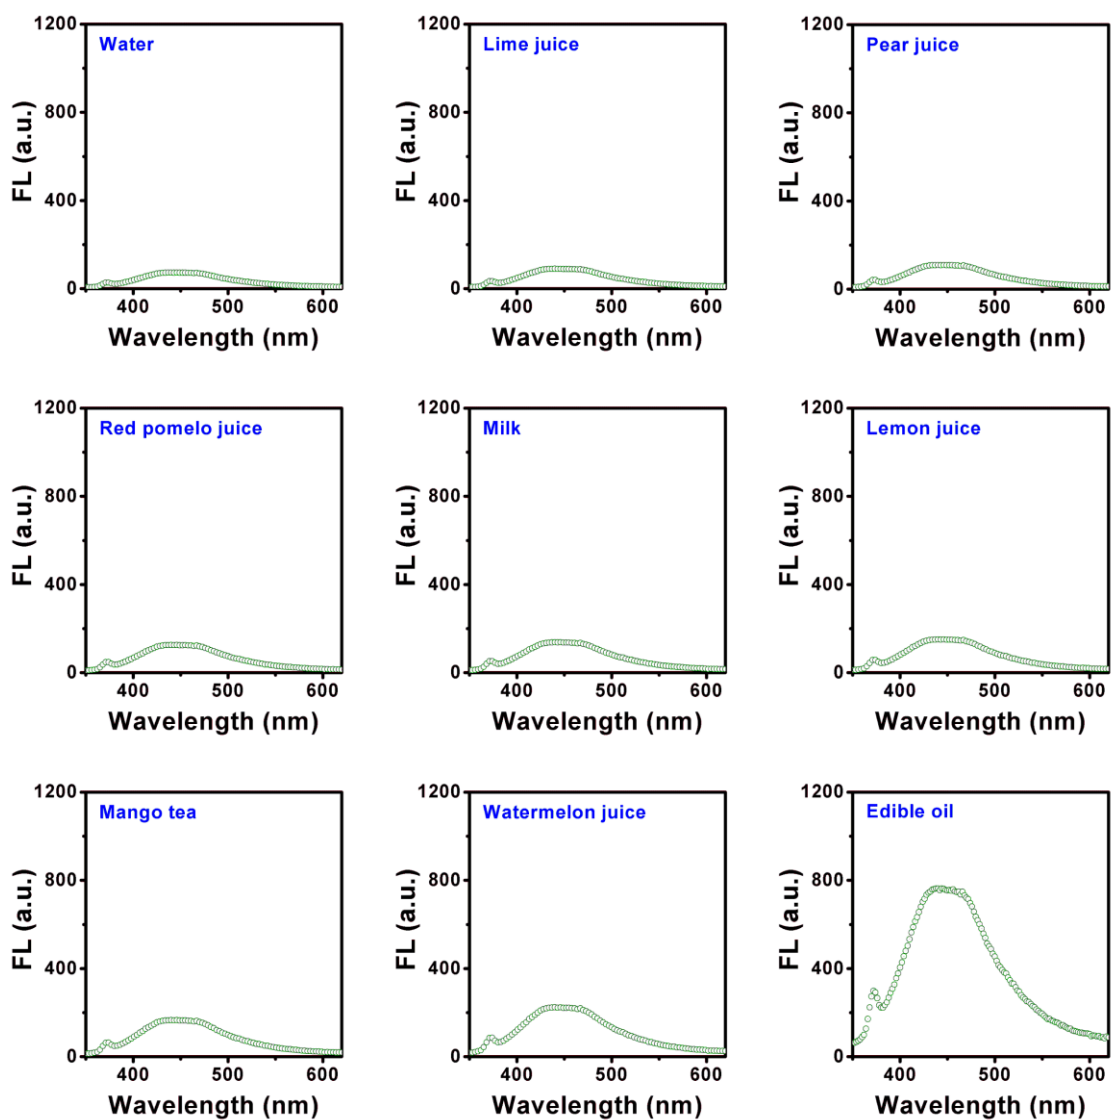

**Figure S5** Fluorescence spectra of the natural molecular sensor **RA** (10  $\mu$ M, containing 1% DMSO) in nine kinds of common liquid food, including the water, lime juice, pear juice, red pomelo juice, milk, lemon juice, mango tea, watermelon juice and edible oil,  $\lambda_{\text{ex}}=330$  nm.



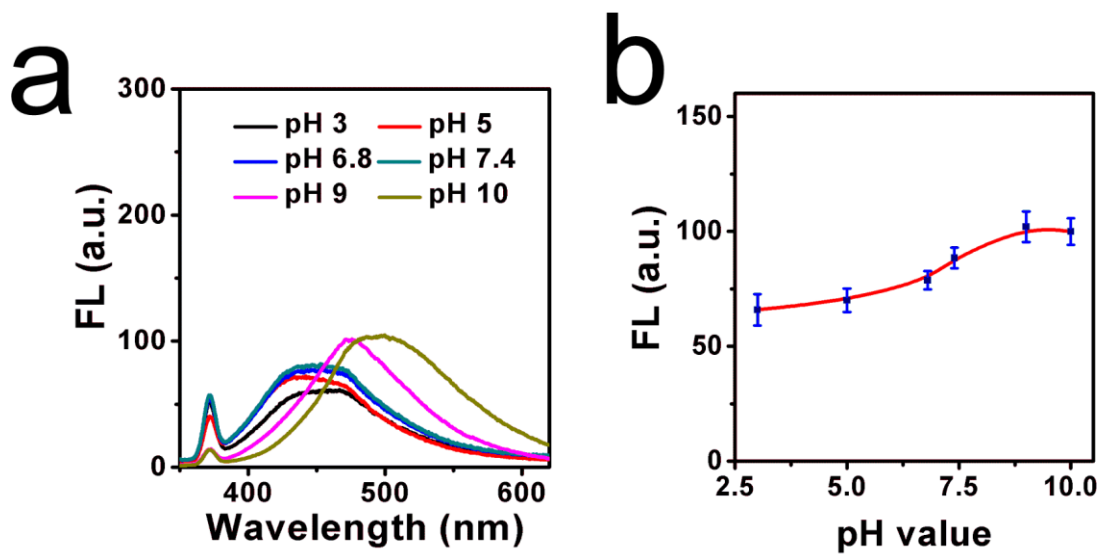

**Figure S6** Fluorescence emission intensity of the natural molecular sensor **RA** (10 μM) under various pH values (containing 1% DMSO) in low viscosity water,  $\lambda_{\text{ex}}=330$  nm.

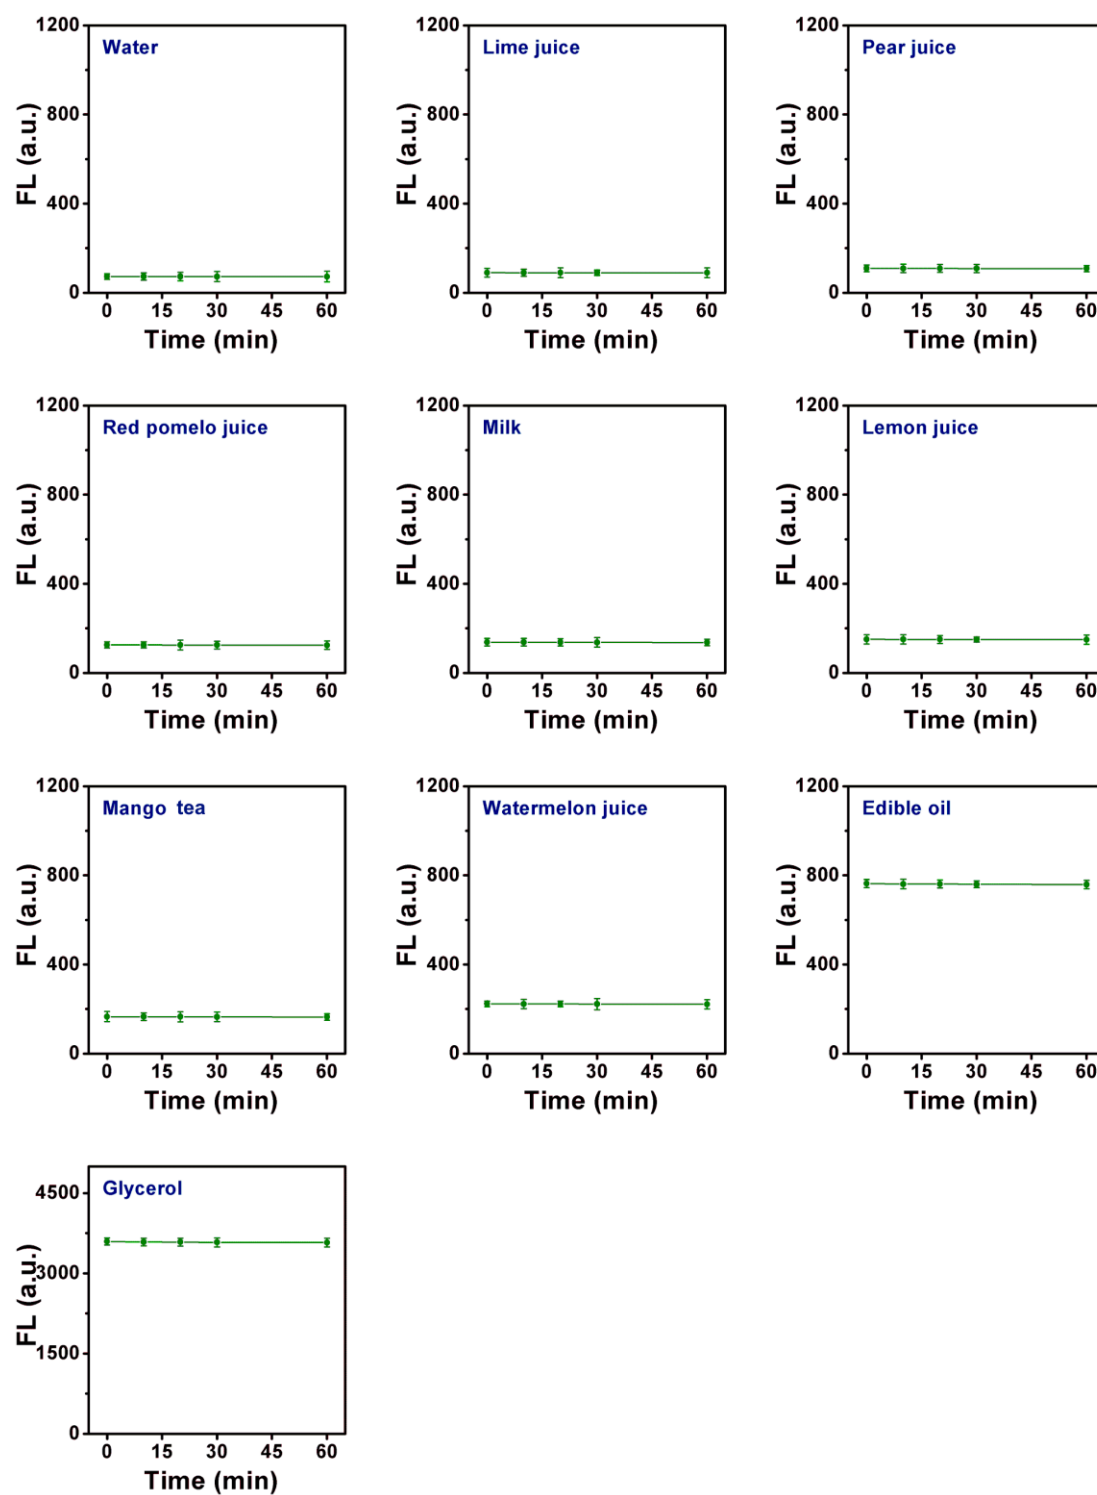

**Figure S7** Photo-stability analysis of the natural molecular sensor **RA** in water, glycerol and other eight kinds of common liquids (containing 1% DMSO). All upon samples were tested under continuous light irradiation with 330 nm UV lamp.

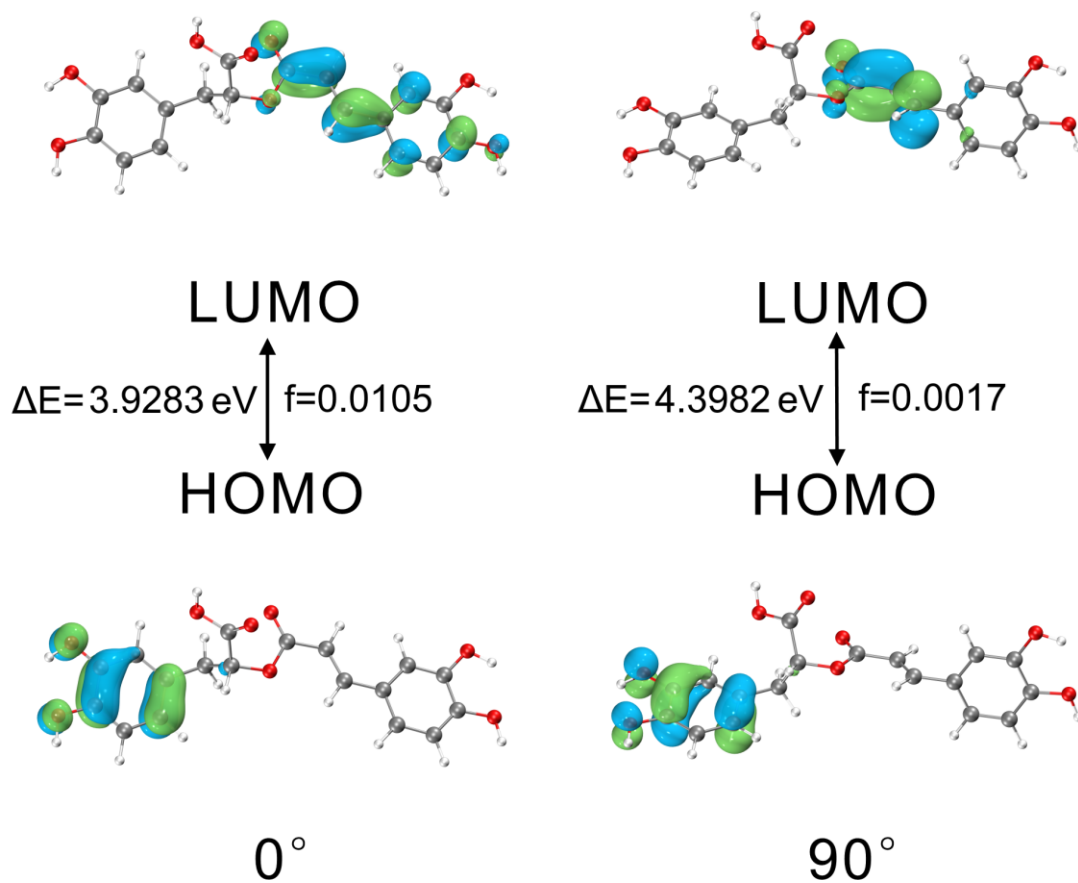

**Figure S8** Optimized molecular structure and calculated molecular orbital energy levels of the LUMOs and HOMOs of **RA** based on B3LYP/6-31G basis set.

**Table S1.** Comparison of the representative fluorescence-based dyes for viscosity detection reported in recent years.

| Probe                                                                               | Sources              | Stokes shift* | Application                                 | Reference |
|-------------------------------------------------------------------------------------|----------------------|---------------|---------------------------------------------|-----------|
| 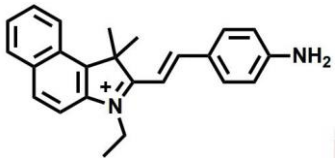   | Artificial synthesis | 72 nm         | Biological system, living cells.            | [1]       |
|    | Artificial synthesis | 90 nm         | Biological system, living cells.            | [2]       |
|    | Artificial synthesis | 20 nm         | Biological system, living cells.            | [3]       |
|  | Artificial synthesis | 35 nm         | Biological system, living cells, in vivo.   | [4]       |
|  | Artificial synthesis | 55 nm         | Biological system, living cells.            | [5]       |
|  | Artificial synthesis | 20 nm         | Biological system, living cells, rat slice. | [6]       |
|  | Artificial synthesis | 83 nm         | Biological system, living cells.            | [7]       |

|                                                                                     |                      |         |                                                   |           |
|-------------------------------------------------------------------------------------|----------------------|---------|---------------------------------------------------|-----------|
| 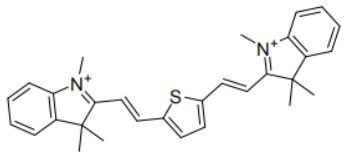   | Artificial synthesis | 70 nm   | Biological system, living cell.                   | [8]       |
|    | Artificial synthesis | 90 nm   | Biological system, living cell, zebra fish, mice. | [9]       |
|    | Artificial synthesis | 90 nm   | Biological system, living cell.                   | [10]      |
|   | Artificial synthesis | 60 nm   | Biological system, living cell.                   | [11]      |
|  | Natural product      | 88.0 nm | Liquid food, food spoilage analysis.              | This work |

\* The Stokes shift herein was obtained from the absorption and emission measured in the glycerol.

**Table S2.** Fluorescence intensity of commercial liquids with the molecular sensor **RA**.

| Liquids          | Fluorescence intensity |
|------------------|------------------------|
| Water            | 63.10                  |
| Lime juice       | 93.22                  |
| Pear juice       | 113.50                 |
| Red pomelo juice | 124.50                 |
| Milk             | 142.30                 |
| Lemon juice      | 149.50                 |
| Mango tea        | 170.60                 |
| Watermelon juice | 230.80                 |
| Edible oil       | 758.60                 |

**Table S3.** Viscosity values of the liquids determined by viscometer and fluorescent spectrometer.

| Liquids          | Viscosity (cP) | Calculated (cP) |
|------------------|----------------|-----------------|
| Water            | 1.00           | 1.02            |
| Lime juice       | 1.42           | 1.47            |
| Pear juice       | 2.10           | 2.06            |
| Red pomelo juice | 2.44           | 2.49            |
| Milk             | 3.01           | 3.03            |
| Lemon juice      | 3.50           | 3.54            |
| Mango tea        | 4.28           | 4.34            |
| Watermelon juice | 7.52           | 7.45            |
| Edible oil       | 68.10          | 68.22           |

**Table S4.** Photo-physical properties of the molecular sensor **RA** in different solvents.

| Solvents | Dielectric constant ( $\epsilon$ ) | $\eta$ (cP) | Absorption $\lambda_{ab}$ (nm) | Emission $\lambda_{em}$ (nm) |
|----------|------------------------------------|-------------|--------------------------------|------------------------------|
| Glycerol | 45.8                               | 956.0       | 333.8                          | 421.8                        |
| Water    | 78.5                               | 1.0         | 330.5                          | 454.3                        |
| Toluene  | 2.4                                | 0.6         | 324.5                          | 377.8                        |
| DMSO     | 46.8                               | 2.1         | 329.9                          | 421.6                        |
| THF      | 7.4                                | 0.5         | 327.9                          | 412.1                        |
| Ethanol  | 24.9                               | 1.2         | 328.8                          | 415.4                        |
| DMF      | 36.7                               | 0.8         | 329.4                          | 418.1                        |
| EA       | 6.1                                | 0.4         | 327.3                          | 394.9                        |

## References

- 1 B. Chen, C. Li, J. Zhang, J. Kan, T. Jiang, J. Zhou and H. Ma, *Chem. Commun.*, 2019, **55**, 7410–7413.
- 2 G. Zhang, Y. Sun, X. He, W. Zhang, M. Tian, R. Feng, R. Zhang, X. Li, L. Guo, X. Yu and S. Zhang, *Anal. Chem.*, 2015, **87**, 12088–12095.
- 3 L.-L. Li, K. Li, M.-Y. Li, L. Shi, Y.-H. Liu, H. Zhang, S.-L. Pan, N. Wang, Q. Zhou and X.-Q. Yu, *Anal. Chem.*, 2018, **90**, 5873–5878.
- 4 M. Ren, L. Wang, X. Lv, J. Liu, H. Chen, J. Wang and W. Guo, *J. Mater. Chem. B*, 2019, **7**, 6181–6186.
- 5 L. Zhu, M. Fu, B. Yin, L. Wang, Y. Chen and Q. Zhu, *Dye. Pigment.*, 2020, **172**, 107859.
- 6 S. J. Park, B. K. Shin, H. W. Lee, J. M. Song, J. T. Je and H. M. Kim, *Dye. Pigment.*, 2020, **174**, 108080.
- 7 K. Zhou, M. Ren, B. Deng and W. Lin, *New J. Chem.*, 2017, **41**, 11507–11511.
- 8 Y. Baek, S. J. Park, X. Zhou, G. Kim, H. M. Kim and J. Yoon, *Biosens. Bioelectron.*, 2016, **86**, 885–891.
- 9 J. Yin, M. Peng and W. Lin, *Anal. Chem.*, 2019, **91**, 8415–8421.
- 10 Z. Zou, Q. Yan, S. Ai, P. Qi, H. Yang, Y. Zhang, Z. Qing, L. Zhang, F. Feng and R. Yang, *Anal. Chem.*, 2019, **91**, 8574–8581.
- 11 L. He, Y. Yang and W. Lin, *Anal. Chem.*, 2019, **91**, 15220–15228.
